# Supplementary material for: Vowel Length Expands Perceptual and Emotional Evaluations in Written Japanese Sound-Symbolic Words
Source: MDPI journal article supplement (doi:10.3390/bs11060090), 2021-06-21
Supplement: s1 [file s1]

**Table S1.** Descriptive statistics for written Japanese sound symbolic words including long vowels (LV) and short vowels (SV).

| Japanese characters,<br>alphabetic letters,<br>vowel length<br>(Long Vowel: LV;<br>Short Vowel: SV) | familiarity |           | visual imageability |           | auditory imageability |           | tactile imageability |           | emotional valence |           | arousal  |           | length   |           | speed    |           |
|-----------------------------------------------------------------------------------------------------|-------------|-----------|---------------------|-----------|-----------------------|-----------|----------------------|-----------|-------------------|-----------|----------|-----------|----------|-----------|----------|-----------|
|                                                                                                     | <i>M</i>    | <i>SD</i> | <i>M</i>            | <i>SD</i> | <i>M</i>              | <i>SD</i> | <i>M</i>             | <i>SD</i> | <i>M</i>          | <i>SD</i> | <i>M</i> | <i>SD</i> | <i>M</i> | <i>SD</i> | <i>M</i> | <i>SD</i> |
| フーフー, <i>fuufuu</i> , LV                                                                            | 3.74        | 1.02      | 3.63                | 1.22      | 4.01                  | 1.04      | 3.20                 | 1.26      | 3.30              | 0.81      | 1.95     | 0.94      | 3.72     | 0.95      | 2.38     | 0.88      |
| フフ, <i>fufu</i> , SV                                                                                | 3.38        | 1.20      | 2.63                | 1.31      | 2.91                  | 1.40      | 2.11                 | 1.17      | 3.32              | 1.00      | 1.88     | 0.82      | 1.65     | 0.66      | 2.99     | 1.03      |
| ジージー, <i>jijii</i> , LV                                                                             | 2.76        | 1.11      | 2.94                | 1.22      | 3.37                  | 1.19      | 2.50                 | 1.18      | 2.60              | 0.91      | 2.89     | 0.99      | 3.78     | 0.92      | 2.33     | 0.90      |
| ジジ, <i>jiji</i> , SV                                                                                | 2.68        | 1.21      | 2.66                | 1.27      | 2.87                  | 1.30      | 2.30                 | 1.18      | 2.75              | 0.95      | 2.84     | 0.91      | 1.63     | 0.77      | 2.97     | 1.17      |
| ヒーヒー, <i>hiihii</i> , LV                                                                            | 2.67        | 1.03      | 2.98                | 1.30      | 3.26                  | 1.17      | 2.20                 | 1.21      | 2.31              | 0.87      | 3.44     | 0.96      | 3.58     | 0.86      | 2.71     | 0.90      |
| ヒヒ, <i>hihi</i> , SV                                                                                | 2.33        | 1.13      | 2.34                | 1.31      | 2.56                  | 1.30      | 1.92                 | 1.09      | 2.46              | 0.89      | 2.75     | 0.90      | 1.67     | 0.81      | 3.40     | 1.07      |
| シーシー, <i>shiishii</i> , LV                                                                          | 3.03        | 1.14      | 2.79                | 1.31      | 3.23                  | 1.27      | 2.34                 | 1.18      | 2.79              | 0.84      | 2.31     | 0.86      | 3.65     | 0.88      | 2.70     | 0.89      |
| シシ, <i>shishi</i> , SV                                                                              | 2.17        | 1.00      | 2.01                | 1.17      | 2.17                  | 1.20      | 1.91                 | 1.06      | 2.58              | 0.80      | 2.55     | 0.92      | 1.63     | 0.71      | 3.55     | 1.04      |
| チューチュー, <i>chuuchuu</i> , LV                                                                        | 4.00        | 0.98      | 4.05                | 1.00      | 4.22                  | 0.91      | 3.66                 | 1.19      | 3.49              | 0.99      | 2.51     | 0.92      | 3.81     | 0.91      | 2.74     | 1.00      |
| チュチュ, <i>chuchu</i> , SV                                                                            | 3.62        | 1.03      | 3.36                | 1.13      | 3.52                  | 1.17      | 3.21                 | 1.23      | 3.49              | 1.00      | 2.48     | 0.98      | 1.84     | 0.82      | 3.41     | 1.01      |
| ブーブー, <i>buubuu</i> , LV                                                                            | 3.54        | 1.24      | 3.75                | 1.19      | 4.13                  | 1.04      | 2.89                 | 1.28      | 2.74              | 1.07      | 3.30     | 1.06      | 3.46     | 0.94      | 2.61     | 1.08      |
| ブブ, <i>bubu</i> , SV                                                                                | 2.35        | 1.09      | 2.33                | 1.18      | 3.19                  | 1.28      | 2.10                 | 1.14      | 2.34              | 0.95      | 3.04     | 0.89      | 1.50     | 0.62      | 2.89     | 1.20      |
| ヒョーヒョー, <i>hyohyoo</i> , LV                                                                         | 2.25        | 1.07      | 2.13                | 1.12      | 2.46                  | 1.24      | 1.88                 | 1.06      | 2.52              | 0.88      | 2.78     | 0.94      | 3.68     | 0.85      | 3.01     | 1.03      |
| ヒョヒョ, <i>hyohyo</i> , SV                                                                            | 2.26        | 1.16      | 1.89                | 1.10      | 2.19                  | 1.16      | 1.66                 | 0.93      | 2.47              | 0.92      | 2.53     | 0.85      | 2.00     | 0.93      | 3.20     | 1.05      |
| ニャーニャー, <i>nyaanyaa</i> , LV                                                                        | 4.56        | 0.68      | 4.38                | 0.84      | 4.46                  | 0.88      | 3.59                 | 1.31      | 4.21              | 0.87      | 1.97     | 1.04      | 3.74     | 0.90      | 2.57     | 1.05      |
| ニヤニヤ, <i>nyanya</i> , SV                                                                            | 3.81        | 1.05      | 3.60                | 1.16      | 3.52                  | 1.23      | 2.88                 | 1.34      | 3.59              | 1.12      | 2.14     | 0.93      | 2.08     | 0.90      | 3.15     | 0.98      |
| ジャージャー, <i>jaajaa</i> , LV                                                                          | 3.05        | 1.18      | 3.57                | 1.28      | 3.89                  | 1.16      | 3.05                 | 1.31      | 2.81              | 0.85      | 3.58     | 0.98      | 3.89     | 0.89      | 3.36     | 1.00      |
| ジャジャ, <i>jaja</i> , SV                                                                              | 2.18        | 1.02      | 2.13                | 1.09      | 2.53                  | 1.22      | 1.97                 | 1.04      | 2.39              | 0.81      | 3.53     | 0.91      | 1.93     | 0.83      | 3.20     | 1.01      |
| コーコー, <i>kookoo</i> , LV                                                                            | 2.22        | 1.03      | 1.80                | 1.03      | 2.12                  | 1.20      | 1.63                 | 0.86      | 2.76              | 0.71      | 2.43     | 0.84      | 3.63     | 0.92      | 2.66     | 0.85      |
| ココ, <i>koko</i> , SV                                                                                | 2.78        | 1.25      | 1.95                | 1.07      | 2.20                  | 1.24      | 1.80                 | 1.01      | 3.17              | 0.90      | 2.13     | 0.83      | 1.55     | 0.66      | 3.18     | 1.05      |

*M*: mean; *SD*: standard deviation; ALL: all written Japanese sound symbolic words used in this study; LV: written Japanese sound symbolic words including long vowels; SV: written Japanese sound symbolic words including short vowels. The Japanese character was a katakana character that are one of Japanese characters [45,46]. These means and standard deviations were calculated on R [49] and an R package psych [50]. In the survey study, participants evaluated each written Japanese sound symbolic word by using 5-point semantic differential scales [29,30] associated with familiarity (1: unfamiliar; 5: familiar), visual imageability (1: not visually imageable; 5: visually imageable), auditory imageability (1: not auditorily imageable; 5: auditorily imageable), tactile imageability (1: not tactily imageability; 5: tactily imageability), emotional valence (1: dislike; 5: like), arousal (1: calm; 5: excited), length (1: short; 5: long) and speed (1: slow; 5: fast). *fuufuu*, *fufu*, *jijii*, *jiji*, *jaajaa*, and *jaja* could be written as *huuhuu*, *huhu*, *ziizii*, *zizi*, *zyaazyaa*, and *zyazyza*, respectively.
